# Supplementary material for: CD30 expression and survival in extranodal NK/T-cell lymphoma: a systematic review and meta-analysis
Source: PubMed Central journal article supplement (PMC5893261; doi:10.18632/oncotarget.24044), 2018-01-08
Supplement: oncotarget-09-16547-s001.pdf [file oncotarget-09-16547-s001.pdf]

# CD30 expression and survival in extranodal NK/T-cell lymphoma: a systematic review and meta-analysis

## SUPPLEMENTARY MATERIALS

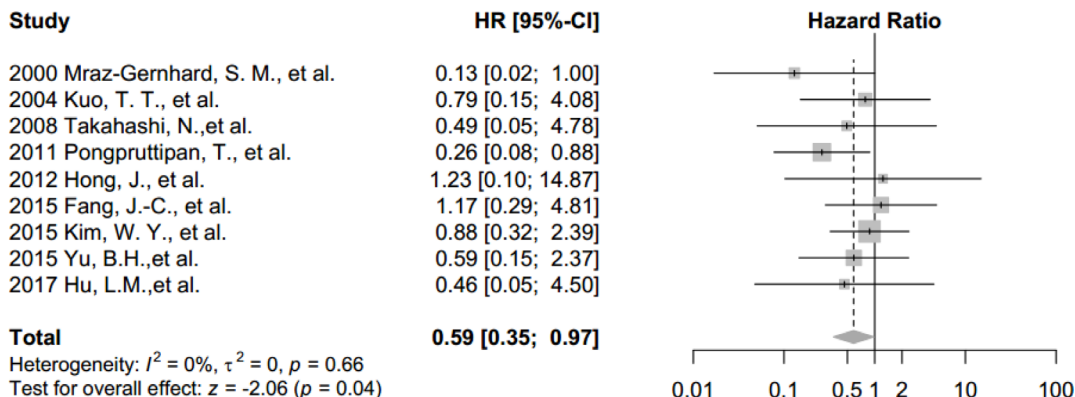

Supplementary Figure 1: Forest plot of the effect of CD30 expression on patient survival stratified by pure ENKTL cohorts.

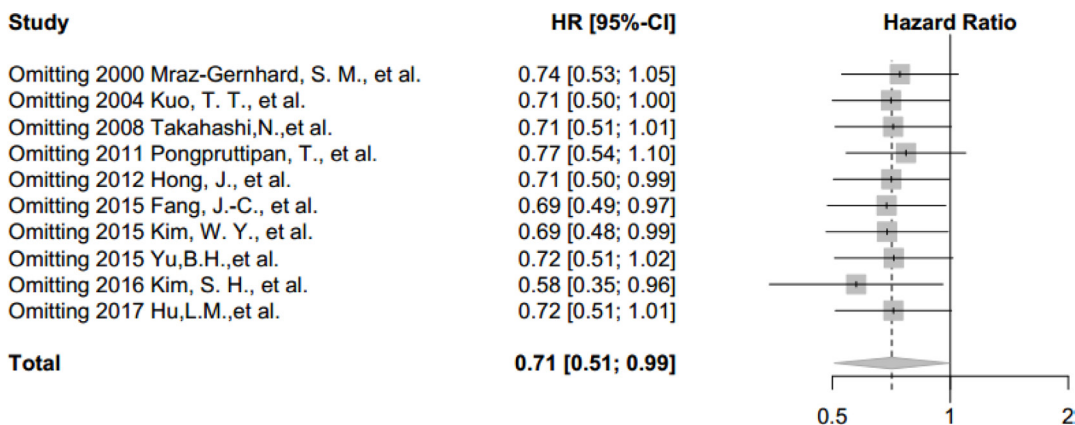

Supplementary Figure 2: Sensitivity analysis (leave-one-out) of the effect of CD30 expression on ENKTL.

| Study                                                                      | HR [95%-CI]              |
|----------------------------------------------------------------------------|--------------------------|
| <b>Sites = Mixed NKTL</b>                                                  |                          |
| 2000 Mraz-Gernhard, S. M., et al.                                          | 0.13 [0.02; 1.00]        |
| 2008 Takahashi, N., et al.                                                 | 0.49 [0.05; 4.78]        |
| 2015 Kim, W. Y., et al.                                                    | 0.88 [0.32; 2.39]        |
| 2016 Kim, S. H., et al.                                                    | 0.84 [0.53; 1.31]        |
| <b>Total</b>                                                               | <b>0.77 [0.52; 1.15]</b> |
| Heterogeneity: $I^2 = 8\%$ , $\tau^2 = 0.0292$ , $p = 0.35$                |                          |
| Test for effect in subgroup: $z = -1.28$ ( $p = 0.20$ )                    |                          |
| <b>Sites = Nasal NKTL</b>                                                  |                          |
| 2004 Kuo, T. T., et al.                                                    | 0.79 [0.15; 4.08]        |
| 2011 Pongpruttipan, T., et al.                                             | 0.26 [0.08; 0.88]        |
| 2012 Hong, J., et al.                                                      | 1.23 [0.10; 14.87]       |
| <b>Total</b>                                                               | <b>0.45 [0.18; 1.12]</b> |
| Heterogeneity: $I^2 = 0\%$ , $\tau^2 = 0$ , $p = 0.40$                     |                          |
| Test for effect in subgroup: $z = -1.72$ ( $p = 0.09$ )                    |                          |
| <b>Sites = Primary intestinal NKTL</b>                                     |                          |
| 2015 Fang, J.-C., et al.                                                   | 1.17 [0.29; 4.81]        |
| 2015 Yu, B.H., et al.                                                      | 0.59 [0.15; 2.37]        |
| 2017 Hu, L.M., et al.                                                      | 0.46 [0.05; 4.50]        |
| <b>Total</b>                                                               | <b>0.75 [0.30; 1.87]</b> |
| Heterogeneity: $I^2 = 0\%$ , $\tau^2 = 0$ , $p = 0.71$                     |                          |
| Test for effect in subgroup: $z = -0.61$ ( $p = 0.54$ )                    |                          |
| <b>Total</b>                                                               | <b>0.71 [0.51; 1.00]</b> |
| Heterogeneity: $I^2 = 0\%$ , $\tau^2 = 0$ , $p = 0.65$                     |                          |
| Test for subgroup differences: $\chi^2_2 = 1.14$ , $df = 2$ ( $p = 0.56$ ) |                          |

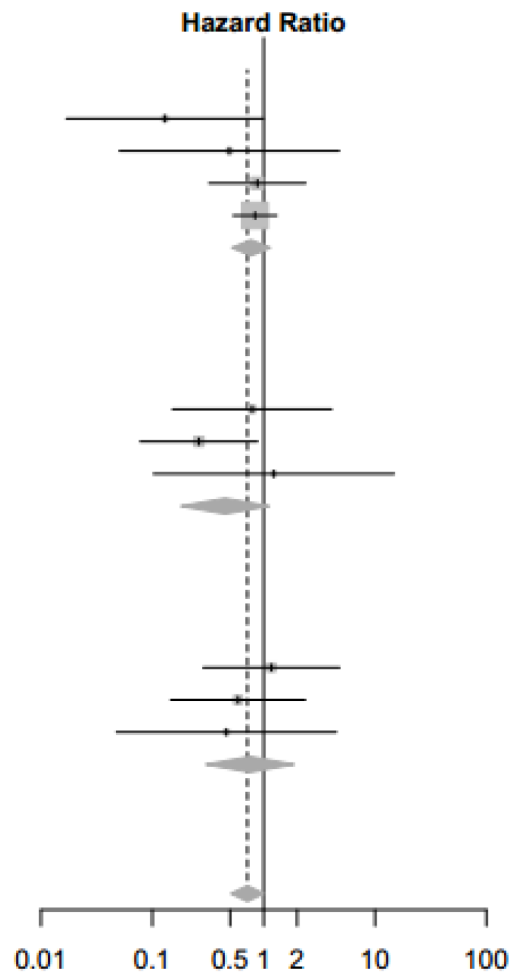

Supplementary Figure 3: Forest plot of the effect of CD30 expression on patient survival stratified by tumor site.

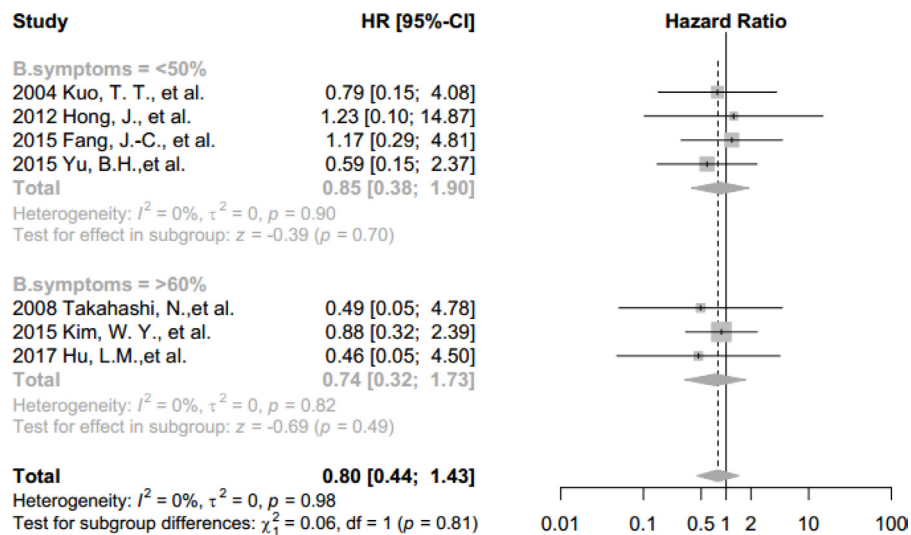

Supplementary Figure 4: Forest plot of the effect of CD30 expression on patient survival stratified by B symptoms.

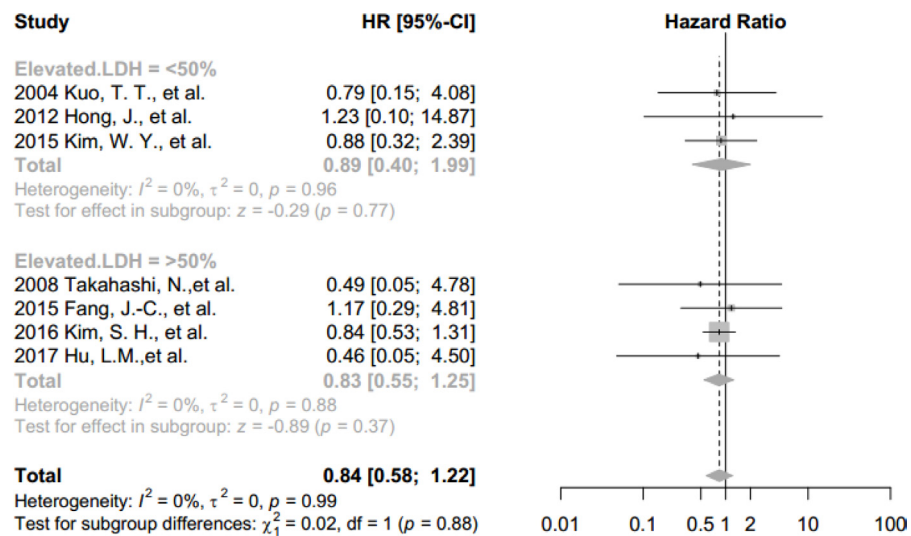

Supplementary Figure 5: Forest plot of the effect of CD30 expression on patient survival stratified by elevated LDH.

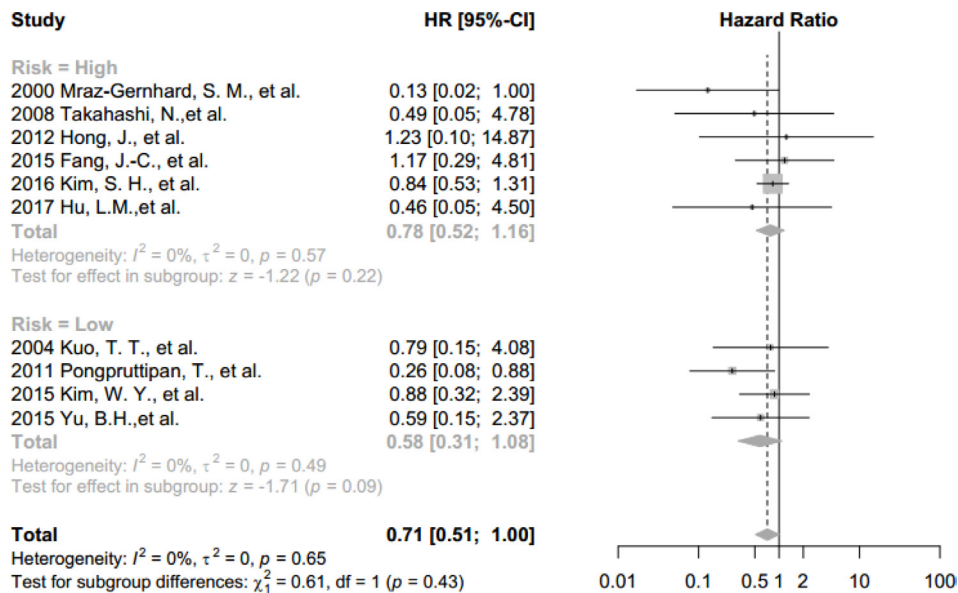

Supplementary Figure 6: Forest plot of the effect of CD30 expression on patient survival stratified by risk of bias.

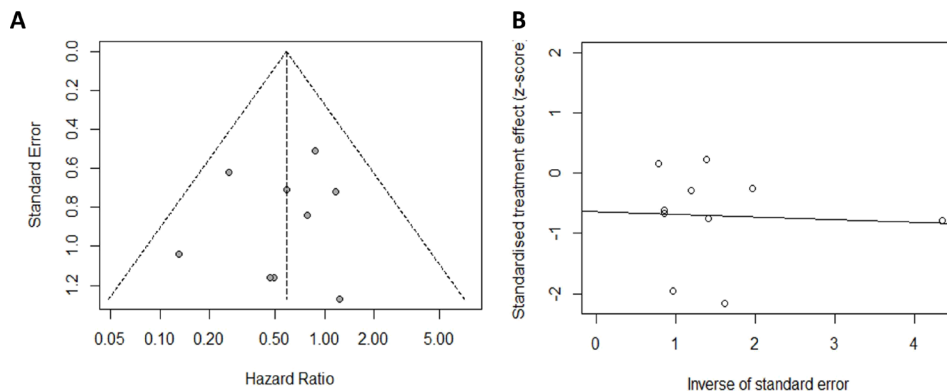

Supplementary Figure 7: Funnel plot for meta-analysis of 10 studies without small-study effect (A) and Radial plot including regression line (solid line) for Egger's test (B). Each point represents a separate study. There is no evidence for significant small-study bias.

Supplementary Table 1: Clinicopathological features of included studies. See Supplementary\_Table\_1

Supplementary Table 2: Risk of bias assessment in details. See Supplementary\_Table\_2
